# Supplementary material
Source: publisher figshare collection journal article supplement (https://frontiersin.figshare.com/ndownloader/files/13149245)
Supplement: Supplementary file 1 [file 13149245]

|  | **Log2 differential expression** | | | |  |  |
| --- | --- | --- | --- | --- | --- | --- |
| **Venn location (Fig. 4)** | **Heron +3** | **Heron +1.5** | **Palm +1.5** | **Palm +3** | **Gene** | **Putative main function** |
| J | 3.2 | 3.0 | 1.1 | 1.5 | *Homer1* | Stress: neuroprotection |
| J | 2.7 | 2.4 | 1.3 | 1.4 | *Slc22a16* | Transport: carnitine |
| J | 2.7 | 1.8 | 1.0 | 1.3 | *Pde4b* | Immune |
| J | 1.6 | 1.5 | 1.6 | 1.6 | *Gls2* | Metabolism: redox |
| J | 1.8 | 1.8 | 1.2 | 1.1 | *Cgref1* | Stress: apoptosis |
| J | 1.2 | 1.4 | 1.6 | 1.7 | *Jag1* | Growth: development |
| J | 1.2 | 2.0 | 1.1 | 1.2 | *Gm2a* | Metabolism: lipid |
| J | 1.0 | 1.3 | 1.4 | 1.4 | *Impdh1* | Growth: cellular |
| J | 1.4 | 1.2 | 1.3 | 1.2 | *Spryd4* | Uncharacterised |
| J | 1.0 | 1.3 | 1.1 | 1.3 | *Cdkn1* | Stress: DNA damage |
| J | 0.9 | 1.4 | 1.1 | 1.2 | *Fxyd3* | Transport: ion |
| J | 1.2 | 0.9 | 0.8 | 1.5 | *Fam83c* | Cell cycle: mitosis |
| J | 0.8 | 0.9 | 1.3 | 1.2 | *Ybx2* | Transcription |
| J | 1.4 | 1.1 | 0.8 | 0.8 | *Cyp46a1* | Metabolism |
| J | 0.8 | 1.0 | 0.8 | 1.1 | *Tmem56* | Uncharacterised |
| J | 1.1 | 0.7 | 0.7 | 0.6 | *Lima1* | Cell organisation |
| J | -0.9 | -0.9 | 1.0 | 1.0 | *Pdgfc* | Growth |
| J | -0.9 | -1.0 | -0.7 | -0.8 | *Mkl2* | Growth |
| J | -0.9 | -1.1 | -0.7 | -0.9 | *Vdac2* | Transport |
| J | -1.4 | -1.3 | -1.1 | -1.5 | *Cda* | Metabolism |
| J | -1.4 | -2.4 | -0.9 | -0.8 | *Rora* | Transcription |
| J | -1.8 | -1.8 | -1.2 | -1.0 | *Cdc14a* | Cell cycle |
| J | -1.2 | -2.3 | -1.5 | -0.9 | *Bhlhe40* | Circadian rhythm |
| J | -1.5 | -1.8 | -1.4 | -1.4 | *Arrdc3* | Stress: temperature homeostasis |
| J | -2.4 | -2.6 | -1.7 | -1.4 | *Mcm2* | Cell cycle |
| I | 2.7 | 2.6 | 0.6 | 2.3 | *Grb10* | Growth |
| I | 3.3 | 2.1 | 0.8 | 1.4 | *Esrra* | Transcription |
| I | 2.1 | 2.8 | 1.0 | 1.7 | *Cyp8b1* | Metabolism |
| I | 2.1 | 2.7 | 0.9 | 1.8 | *Pde4b* | Immune |
| I | 2.6 | 2.3 | 0.8 | 1.5 | *Ell* | Transcription |
| I | 2.7 | 2.1 | 0.6 | 1.4 | *Nudt8* | Metabolism |
| I | 2.0 | 2.3 | 0.2 | 1.8 | *Grb10* | Growth |
| I | 2.4 | 1.9 | 0.7 | 1.6 | *Ptp4a2* | Cell cycle |
| I | 2.6 | 2.0 | 0.5 | 1.1 | *Mfrp* | Growth |
| I | 2.1 | 2.4 | 0.9 | 1.0 | *Lrrc18* | Growth |
| I | 2.0 | 1.6 | 1.0 | 1.7 | *Grina* | Stress: apoptosis |
| I | 2.2 | 1.5 | 0.3 | 1.2 | *C2cd2* | Metabolism |
| I | 1.5 | 1.8 | 0.9 | 1.4 | *Vipr2* | Circadian rhythm |
| I | 1.4 | 2.0 | 0.4 | 1.4 | *Pde8a* | Signaling |
| I | 2.4 | 1.3 | 0.7 | 1.1 | *Tmem53* | Uncharacterised |
| I | 2.0 | 1.4 | 0.4 | 1.3 | *Tp53bp2* | Stress: apoptosis |
| I | 2.1 | 1.5 | 0.8 | 1.1 | *Dsp* | Cell organisation |
| I | 2.0 | 1.5 | 0.6 | 1.1 | *Xkr8* | Stress: apoptosis |
| I | 1.6 | 1.3 | 0.8 | 1.5 | *Pmm1* | Metabolism |
| I | 1.3 | 1.7 | 0.0 | 1.5 | *R3hdm1* | Uncharacterised |
| I | 1.4 | 1.5 | 1.1 | 1.5 | *Il10rb* | Immune |
| I | 1.6 | 1.3 | 0.6 | 1.6 | *Zswim6* | Growth |
| I | 1.5 | 1.6 | 0.3 | 1.3 | *Rrp1* | Transcription |
| I | 1.8 | 1.4 | 0.6 | 1.1 | *Adipor2* | Metabolism |
| I | 1.9 | 1.5 | 0.7 | 1.0 | *Letm2* | Uncharacterised |
| I | 1.7 | 1.4 | 0.1 | 1.2 | *Slc22a23* | Transport |
| I | 1.6 | 1.3 | 0.7 | 1.3 | *Sptlc2* | Metabolism |
| I | 1.8 | 1.4 | 0.2 | 1.0 | *Sema4g* | Cell organisation |
| I | 1.5 | 1.4 | 0.7 | 1.1 | *Lipe* | Metabolism |
| I | 1.4 | 1.6 | 0.4 | 1.0 | *Tle3* | Transcription |
| I | 1.6 | 1.0 | 0.4 | 1.2 | *Rps6ka6* | Stress: DNA damage |
| I | 1.3 | 1.3 | 0.7 | 1.2 | *Rela* | Transcription |
| I | 1.6 | 1.0 | 0.5 | 1.1 | *Ptpn21* | Stress: cytoprotection |
| I | 1.2 | 1.3 | 0.6 | 1.0 | *Cnot3* | Transcription |
| I | 1.2 | 0.9 | 0.7 | 1.4 | *Rassf3* | Signaling |
| I | 1.4 | 0.9 | 0.8 | 1.0 | *Sh3gl1* | Cell organisation |
| I | 1.3 | 1.0 | 0.2 | 0.8 | *Zbtb2* | Transcription |
| I | 0.9 | 1.1 | 0.6 | 0.9 | *Phf20* | Cell cycle |
| I | 1.0 | 0.9 | 0.7 | 1.0 | *Sirt1* | Transcription |
| I | 1.0 | 0.9 | 0.8 | 0.9 | *Tbc1d4* | Metabolism |
| I | 0.8 | 0.8 | 0.4 | 1.1 | *Trip12* | Stress: ubiquitination |
| I | 0.8 | 1.0 | 0.4 | 0.8 | *Ppp1cb* | Transcription |
| I | -1.4 | -1.2 | 0.4 | 1.3 | *Mrc1* | Immune |
| I | -1.1 | -1.3 | 0.3 | 0.8 | *Deptor* | Stress: apoptosis |
| I | -1.0 | -1.1 | -0.7 | -0.8 | *Ehd2* | Cell organisation |
| I | -1.2 | -1.2 | -0.4 | -0.7 | *Tp53i3* | Stress: oxidative stress |
| I | -1.1 | -1.4 | -0.4 | -0.8 | *Limk2* | Cell organisation |
| I | -1.4 | -1.2 | -0.5 | -0.9 | *Lurap1* | Immune |
| I | -1.3 | -1.2 | -0.7 | -1.0 | *LOC110954289* | Uncharacterised |
| I | -1.7 | -1.4 | -0.1 | -0.6 | *Anxa4* | Cell organisation |
| I | -1.8 | -1.9 | -0.6 | -0.9 | *Tm4sf4* | Growth |
| K | 1.8 | 0.3 | 1.5 | 2.2 | *Cdca9* | Cell cycle |
| K | 1.7 | 0.5 | 1.3 | 2.1 | *Plin2* | Metabolism |
| K | 1.3 | 0.3 | 1.6 | 2.0 | *Med12* | Transcription |
| K | 1.8 | 1.6 | 1.4 | 1.6 | *Lipg* | Metabolism |
| K | 1.9 | 0.7 | 1.3 | 1.5 | *Tor3a* | Uncharacterised |
| K | 1.6 | 0.6 | 0.9 | 1.3 | *Ppm1d* | Stress: -reg of CSR |
| K | -0.7 | -0.4 | 1.1 | 1.2 | *Brpf3* | Transcription |
| K | -1.1 | -0.9 | -1.1 | -1.5 | *Dnajc16* | Stress: HSP |
| K | -1.4 | -1.0 | -1.7 | -1.5 | *Per1* | Circadian Rhythm |
| K | -1.7 | -1.1 | -1.2 | -1.9 | *Hmox2* | Metabolism |
| K | -0.9 | -0.1 | -2.0 | -1.9 | *Dpyd* | Stress: DNA damage |
| K | -1.7 | -1.1 | -1.6 | -1.6 | *Hsf1* | Stress: HSP |
| K | -2.9 | -0.9 | -1.4 | -1.4 | *Gpi* | Metabolism |
| M | 0.7 | 1.2 | 1.0 | 1.1 | *Pacs2* | Stress: apoptosis |
| M | -0.3 | -1.5 | 1.5 | 1.4 | *Lonrf3* | Metabolism |
| M | 0.1 | -1.3 | 1.0 | 1.2 | *Rorb* | Circadian Rhythm |
| M | 0.4 | 1.1 | -0.7 | -0.7 | *Slc39a8* | Immune |
| M | -1.2 | -1.6 | -0.8 | -0.8 | *Magi1* | Cell organisation |
| M | -0.8 | -1.3 | -1.4 | -1.3 | *C1orf116* | Growth |
| M | -0.4 | -2.0 | -1.5 | -1.6 | *Per3* | Circadian rhythm |
| L | 1.7 | 1.4 | 0.9 | 0.7 | *Trim24* | Transcription |
| L | -1.0 | -0.9 | -1.0 | -0.6 | *Gal3st1* | Metabolism |
| L | -1.8 | -1.8 | -0.8 | -0.5 | *Tagln* | Cell organisation |
| L | -1.9 | -2.7 | -1.4 | -1.1 | *Col6a2* | Cell organisation |
| H | 2.8 | 1.1 | 1.1 | 2.6 | *Timp2* | Growth |
| H | 2.7 | 1.6 | 1.0 | 1.4 | *Camk4* | Transcription |
| H | 1.5 | 0.3 | 1.0 | 1.7 | *Skor2* | Growth |
| H | 1.8 | 0.9 | 0.7 | 1.4 | *Ier3* | Stress: apoptosis |
| H | 1.8 | 0.8 | 0.8 | 1.4 | *Tp53bp2* | Stress: apoptosis |
| H | 2.0 | 0.8 | 0.9 | 1.1 | *Acaa2* | Stress: apoptosis |
| H | 1.6 | 0.3 | 0.6 | 1.3 | *Kdm6b* | Transcription |
| H | 1.4 | 0.3 | 0.7 | 1.5 | *Ssh2* | Cell organisation |
| H | 1.5 | 0.9 | 0.6 | 1.1 | *Szrd1* | Uncharacterised |
| H | 1.3 | 0.7 | 0.6 | 1.1 | *Atp13a2* | Transport |
| H | 1.2 | 0.4 | 0.1 | 1.1 | *Foxo4* | Stress: -reg hypoxia |
| H | 1.1 | 0.6 | 0.8 | 1.2 | *Sar1b* | Transport |
| H | 1.3 | 0.7 | 0.6 | 1.0 | *Etv5* | Transcription |
| H | 1.3 | 0.5 | 0.3 | 0.9 | *Rras* | Cell organisation |
| H | 1.1 | 0.4 | 0.7 | 1.0 | *Ddit3* | Stress: cell stress |
| H | 1.2 | 0.7 | 0.3 | 1.0 | *Nt5dc2* | Metabolism |
| H | 1.0 | 0.2 | 0.1 | 1.2 | *Chmp4b* | Cell organisation |
| H | 1.0 | 0.8 | 0.5 | 1.1 | *Vcpip1* | Stress: ubiquitination |
| H | 0.9 | 0.5 | 0.8 | 1.1 | *Klhdc3* | Cell cycle |
| H | 1.1 | 0.7 | 0.5 | 0.9 | *Usp42* | Stress: ubiquitination |
| H | -1.2 | -0.6 | 0.4 | 1.1 | *Slc39a1* | Transport |
| H | -1.1 | -1.1 | 0.3 | 0.7 | *LOC110950114* | Uncharacterised |
| H | -1.2 | -0.9 | 0.1 | 0.7 | *Cd48* | Immune |
| H | -1.2 | -1.2 | -0.7 | -0.7 | *Camk2d* | Transport |
| H | -1.2 | -0.7 | -0.4 | -0.8 | *A2m* | Immune |
| H | -1.4 | -1.0 | -0.4 | -0.9 | *Wdr17* | Immune |
| H | -1.6 | -0.4 | -1.1 | -1.8 | *Chordc1* | Stress: co-chaperone |
| O | 0.8 | 1.1 | 0.2 | 1.5 | *Egln3* | Stress: hypoxia |
| O | -1.0 | -1.2 | 0.6 | 1.6 | *Tnip2* | Stress: apoptosis |
| O | -0.4 | -1.0 | -0.2 | -0.7 | *Neu3* | Metabolism |
| O | -0.9 | -1.8 | -0.5 | -1.2 | *Ip6k2* | Metabolism |
| N | 1.2 | 0.6 | 0.7 | 0.7 | *Serinc1* | Metabolism |
| N | 0.5 | 0.3 | 1.2 | 0.8 | *Noct* | Circadian rhythm |
| N | 2.5 | 0.7 | -1.5 | -0.4 | *Ifitm1* | Immune |
| G | 0.4 | 0.8 | 1.3 | 0.8 | *Adamts6* | Growth |
| G | -0.8 | -1.1 | -1.2 | -1.1 | *Slc25a34* | Transport |
| G | -1.0 | -1.6 | -1.3 | 0.0 | *Abca1* | Transport |
| F | -0.3 | 0.0 | 1.8 | 2.0 | *Ppm1k* | Stress: apoptosis |
| F | -0.2 | 0.5 | 1.3 | 1.7 | *Rasgrp3* | Signaling |
| F | 0.7 | 0.5 | 1.4 | 1.5 | *Gdf11* | Growth |
| F | 0.4 | 0.5 | 1.5 | 1.4 | *Iffo2* | Uncharacterised |
| F | 0.5 | 0.5 | 1.4 | 1.2 | *Slc19a1* | Transport |
| F | 0.5 | 0.0 | 1.1 | 1.5 | *Tgif1* | Growth |
| F | 0.2 | 0.3 | 1.4 | 1.2 | *Kcng3* | Transport |
| F | 0.1 | 0.5 | 1.3 | 1.2 | *Fgd6* | Cell organisation |
| F | 1.1 | 1.2 | 1.2 | 1.4 | *Bnc2* | Growth |
| F | 0.9 | -0.4 | 1.1 | 1.4 | *Rorb* | Circadian rhythm |
| F | 0.7 | 0.6 | 1.3 | 1.2 | *Tom1* | Cell organisation |
| F | 0.3 | 0.2 | 1.1 | 1.2 | *Kiaa1107* | Uncharacterised |
| F | 0.5 | -0.1 | 0.9 | 1.3 | *Mb21d2* | Cell organisation |
| F | 0.8 | 1.0 | 1.1 | 1.1 | *Malt1* | Immune |
| F | 0.4 | 0.3 | 1.0 | 1.1 | *Anp32b* | Stress: anti-apoptosis |
| F | 0.2 | -0.5 | 1.2 | 0.8 | *Pdp1* | Metabolism |
| F | 0.3 | 0.6 | 0.9 | 1.0 | *Ankrd50* | Transport |
| F | -0.2 | -0.4 | 1.1 | 0.7 | *Ankrd9* | Uncharacterised |
| F | -0.6 | -0.1 | -0.9 | -1.1 | *Tkt* | Metabolism |
| F | -0.3 | 0.1 | -1.0 | -1.0 | *Malt2* | Cell organisation |
| F | -0.5 | -0.7 | -0.9 | -1.2 | *Tmem97* | Metabolism |
| F | 0.8 | 0.7 | -1.3 | -1.0 | *Nle1* | Growth |
| F | -0.1 | -0.2 | -1.1 | -1.2 | *Por* | Metabolism |
| F | -0.2 | -0.2 | -1.3 | -1.2 | *Tp5* | Immune |
| F | -0.4 | -0.5 | -1.3 | -1.1 | *Csnk1d* | Cell cycle |
| F | -0.3 | -0.3 | -1.2 | -1.3 | *Ubap1* | Stress: ubiquitination |
| F | -0.4 | -0.3 | -1.5 | -1.4 | *Mat2a* | Metabolism |
| F | 0.0 | -0.8 | -1.3 | -1.7 | *Hlf* | Transcription |
| C | 3.4 | 3.8 | 0.5 | 1.0 | *Dennd4a* | Cell organisation |
| C | 3.2 | 2.8 | 0.8 | 0.9 | *Trip10* | Cell organisation |
| C | 3.1 | 2.4 | 0.5 | 0.5 | *Mpv17l* | Stress: ROS |
| C | 3.2 | 2.3 | 0.8 | 0.9 | *LOC110950271* | Uncharacterised |
| C | 2.8 | 2.6 | 0.5 | 0.6 | *Trib2* | Stress: apoptosis |
| C | 2.7 | 2.7 | 0.0 | 1.1 | *Snrk* | Growth |
| C | 2.7 | 2.5 | 0.5 | 0.5 | *Mfsd2a* | Transport |
| C | 2.5 | 2.5 | 0.6 | 0.9 | *Atp1b2* | Transport |
| C | 2.7 | 2.1 | 0.6 | 1.0 | *Cycs* | Metabolism |
| C | 2.7 | 2.0 | 0.5 | 1.2 | *Zbtb21* | Transcription |
| C | 2.7 | 1.9 | 0.1 | 0.6 | *Pparg* | Metabolism |
| C | 2.1 | 2.4 | 0.6 | 1.0 | *Slc43a1* | Transport |
| C | 2.4 | 2.1 | -0.1 | 0.5 | *Grin3a* | Transport |
| C | 2.6 | 1.8 | 0.7 | 1.1 | *Dusp4* | Growth |
| C | 2.7 | 1.7 | 0.6 | 0.8 | *Ell* | Transcription |
| C | 2.3 | 2.0 | 0.8 | 1.0 | *Gal3st1* | Metabolism |
| C | 2.7 | 1.7 | 0.6 | 0.0 | *Stc2* | Stress: hypoxia (GoBP) |
| C | 2.2 | 2.1 | 0.3 | 0.8 | *Slc25a48* | Transport |
| C | 1.8 | 2.5 | 0.3 | -0.5 | *Nlrp12* | Immune |
| C | 2.5 | 1.5 | 0.5 | 0.8 | *Vegfa* | Growth |
| C | 2.4 | 1.5 | 0.1 | 0.5 | *Higd1a* | Metabolism |
| C | 2.4 | 1.5 | 0.8 | 1.2 | *Camk2n1* | Signaling |
| C | 1.7 | 2.2 | 0.5 | 0.5 | *Ivns1abp* | Transcription |
| C | 2.2 | 1.6 | -0.4 | -0.2 | *Cyp27c1* | Metabolism |
| C | 2.3 | 1.5 | 0.6 | 0.9 | *Tmem120b* | Growth |
| C | 1.7 | 2.0 | 0.9 | 0.9 | *Cbs* | Stress: cytoprotection |
| C | 2.5 | 1.1 | 0.1 | 0.6 | *Slc25a29* | Transport |
| C | 1.8 | 1.8 | 0.5 | 0.2 | *Nnt* | Metabolism |
| C | 1.7 | 1.8 | 0.4 | 1.0 | *Hif1a* | Stress: hypoxia |
| C | 1.3 | 2.2 | -0.9 | -0.7 | *Pnpla2* | Metabolism |
| C | 1.9 | 1.4 | 0.9 | 1.1 | *Cdkl1* | Cell cycle |
| C | 1.8 | 1.5 | 0.5 | 0.6 | *Ubtd1* | Stress: ubiquitination |
| C | 1.8 | 1.5 | 0.5 | 0.7 | *Coq10b* | Metabolism |
| C | 1.6 | 1.6 | 0.4 | 0.8 | *Mat2a* | Metabolism |
| C | 1.8 | 1.3 | 0.0 | 1.1 | *Rbms2* | Cell cycle |
| C | 1.8 | 1.3 | 0.0 | 0.7 | *Spsb4* | Stress: ubiquitination |
| C | 1.8 | 1.4 | 0.7 | 0.9 | *Depdc7* | Signaling |
| C | 1.2 | 1.9 | 0.2 | 0.5 | *Fgfrl1* | Growth |
| C | 1.6 | 1.4 | 0.2 | 0.6 | *Mapkapk5* | Stress: HSP MAPK |
| C | 1.8 | 1.1 | 0.1 | 0.7 | *Zfand5* | Stress: ubiquitination |
| C | 1.7 | 1.2 | 0.5 | 0.1 | *Fabp1* | Metabolism |
| C | 1.3 | 1.6 | 0.1 | 0.3 | *Trak1* | Cell organisation |
| C | 1.4 | 1.4 | 0.4 | 0.0 | *Angpt2* | Stress: apoptosis |
| C | 1.4 | 1.4 | 0.0 | 0.8 | *Ca5a* | Metabolism |
| C | 1.9 | 0.9 | -0.4 | 0.9 | *Zfand2a* | Stress: ubiquitination |
| C | 1.5 | 1.1 | 0.2 | 0.1 | *Gnpnat1* | Metabolism |
| C | 1.2 | 1.5 | 0.3 | 0.6 | *Pla2g15* | Metabolism |
| C | 1.2 | 1.5 | 0.3 | 0.9 | *Klf9* | Transcription |
| C | 1.4 | 1.2 | 0.3 | 0.7 | *Bach1* | Transcription |
| C | 1.6 | 1.0 | 0.0 | 0.8 | *Snx11* | Cell organisation |
| C | 1.3 | 1.3 | 0.2 | 0.9 | *Rbms2* | Cell cycle |
| C | 1.3 | 1.3 | 0.3 | 0.2 | *Shroom4* | Growth |
| C | 1.3 | 1.2 | -0.2 | -0.3 | *Narf* | Cell organisation |
| C | 1.2 | 1.2 | -0.2 | 0.5 | *Smad4* | Stress: hypoxia |
| C | 1.3 | 1.2 | 0.5 | 0.8 | *Prkaca* | Growth |
| C | 1.1 | 1.4 | 0.3 | 0.8 | *Fam168a* | Stress: cytoprotection |
| C | 1.4 | 1.0 | -0.4 | 0.4 | *Hccs* | Metabolism |
| C | 1.2 | 1.2 | 0.3 | 0.7 | *Tmem184b* | Signaling |
| C | 1.3 | 1.1 | 0.2 | 0.1 | *Scarb2* | Cell organisation |
| C | 1.0 | 1.3 | 0.4 | 0.8 | *Tbc1d2b* | Signaling |
| C | 1.0 | 1.3 | 0.2 | 0.3 | *Fbln2* | Growth |
| C | 1.2 | 1.1 | 0.7 | 0.6 | *Nit1* | Stress: apoptosis |
| C | 1.1 | 1.3 | 0.1 | 0.0 | *Rhou* | Cell organisation |
| C | 1.4 | 0.9 | 0.6 | 0.6 | *Kiaa1755* | Uncharacterised |
| C | 1.2 | 1.2 | 0.1 | 0.2 | *Tmem106b* | Cell organisation |
| C | 1.1 | 1.2 | 0.0 | 0.1 | *Aph1b* | Signaling |
| C | 1.3 | 0.9 | 0.3 | 0.3 | *Pm20d1* | Metabolism |
| C | 1.1 | 1.1 | 0.4 | 1.1 | *Sik2* | Metabolism |
| C | 1.4 | 0.8 | 0.1 | 0.4 | *Rras* | Cell organisation |
| C | 1.0 | 1.1 | 0.7 | 0.4 | *Pycr1* | Stress: oxidative stress |
| C | 1.0 | 1.1 | 0.2 | 0.7 | *LOC110956759* | Uncharacterised |
| C | 1.2 | 0.9 | 0.1 | 0.2 | *Tpst1* | Metabolism |
| C | 0.9 | 1.3 | -0.1 | 0.8 | *Rapgef5* | Signaling |
| C | 1.1 | 1.0 | 0.2 | 0.4 | *Thnsl1* | Metabolism |
| C | 1.1 | 0.9 | 0.7 | 0.4 | *P14k2b* | Immune |
| C | 1.0 | 1.0 | 0.2 | 0.7 | *Rangap1* | Cell cycle |
| C | 1.0 | 1.0 | -0.1 | 0.5 | *Abhd17a* | Metabolism |
| C | 1.0 | 1.0 | 0.6 | 0.7 | *Ddx3x* | Transcription |
| C | 0.7 | 1.3 | 0.0 | 0.6 | *Col4a3bp* | Metabolism |
| C | 0.8 | 1.2 | 0.4 | 0.7 | *Trim16* | Growth |
| C | 1.2 | 0.8 | 0.3 | 0.3 | *Pm20d1* | Metabolism |
| C | 0.9 | 1.0 | 0.3 | 0.2 | *Agpat5* | Metabolism |
| C | 0.9 | 1.0 | -0.2 | 0.1 | *Gfm1* | Transcription |
| C | 1.0 | 0.9 | 0.4 | 0.8 | *Nr2f6* | Transcription |
| C | -0.7 | -1.1 | 0.1 | -0.1 | *C9orf3* | Metabolism |
| C | -0.8 | -1.0 | -0.1 | 0.1 | *Trim3* | Cell organisation |
| C | -1.0 | -0.8 | -0.1 | 0.2 | *Dennd1a* | Cell organisation |
| C | -0.7 | -1.2 | -0.1 | 0.5 | *Fam129b* | Stress: -reg apoptosis |
| C | -0.9 | -1.0 | -0.6 | -0.1 | *Aldoc* | Metabolism |
| C | -1.0 | -0.9 | -0.4 | -0.2 | *Ccp110* | Cell cycle |
| C | -0.8 | -1.2 | -0.3 | -0.5 | *Phc2* | Transcription |
| C | -1.1 | -0.8 | 0.3 | -0.4 | *A2m* | Immune |
| C | -0.9 | -1.1 | -0.5 | -0.4 | *Myo7a* | Cell organisation |
| C | -1.1 | -1.0 | -0.3 | -0.3 | *Frzb* | Growth |
| C | -0.9 | -1.2 | -0.6 | -0.5 | *Ubash3b* | Cell organisation |
| C | -1.0 | -1.0 | -0.2 | -0.1 | *Prdx1* | Stress: ROS |
| C | -1.0 | -1.0 | -0.4 | 0.2 | *Hes5* | Growth |
| C | -1.1 | -1.0 | -0.1 | 0.4 | *Hck* | Immune |
| C | -1.2 | -1.0 | -0.3 | -0.2 | *Il7r* | Immune |
| C | -1.0 | -1.1 | -0.4 | -0.5 | *LOC110960892* | Uncharacterised |
| C | -0.8 | -1.4 | -0.4 | 0.5 | *Dhrs11* | Metabolism |
| C | -0.9 | -1.3 | -0.4 | 0.1 | *Actn1* | Cell organisation |
| C | -1.2 | -1.1 | 0.3 | 0.4 | *Lpxn* | Cell organisation |
| C | -1.1 | -1.2 | -0.6 | -0.2 | *Rgs12* | Signaling |
| C | -1.0 | -1.3 | -0.2 | 0.0 | *Ptgs2* | Metabolism |
| C | -1.0 | -1.2 | -0.1 | -0.2 | *Gmnn* | Cell cycle |
| C | -1.1 | -1.2 | 0.0 | -0.2 | *Anxa1* | Immune |
| C | -1.2 | -1.1 | 0.1 | 0.3 | *Col4a5* | Cell organisation |
| C | -1.2 | -1.1 | 0.3 | 0.7 | *St6galnac5* | Metabolism |
| C | -1.1 | -1.2 | 0.1 | 0.6 | *Tinag* | Cell organisation |
| C | -1.2 | -1.1 | -0.1 | -0.2 | *Plekha7* | Cell organisation |
| C | -1.3 | -1.0 | -0.3 | -0.2 | *Fyb* | Immune |
| C | -1.1 | -1.2 | -0.2 | -0.5 | *Tbx5* | Growth |
| C | -1.1 | -1.2 | 0.2 | 0.0 | *Marcksl1* | Cell organisation |
| C | -1.2 | -1.2 | -0.6 | -0.3 | *Spint1* | Growth |
| C | -1.2 | -1.2 | -0.9 | -0.7 | *Tgm1* | Metabolism |
| C | -1.1 | -1.3 | -0.2 | 0.1 | *Ywahb* | Cell organisation |
| C | -0.9 | -1.5 | 0.0 | -0.6 | *Atp2a1* | Transport |
| C | -1.2 | -1.2 | 0.2 | 0.0 | *Dhrs11* | Metabolism |
| C | -1.1 | -1.3 | 0.0 | -0.4 | *Anx2ab* | Stress: HSR |
| C | -1.3 | -1.1 | -0.6 | -0.2 | *Cap2* | Cell organisation |
| C | -1.1 | -1.2 | -0.9 | -0.5 | *Def6* | Immune |
| C | -1.1 | -1.3 | -0.2 | -0.3 | *Myl9* | Cell organisation |
| C | -1.0 | -1.4 | -0.3 | -0.5 | *Rassf7* | Stress: -reg apoptosis |
| C | -1.5 | -0.9 | -0.3 | -0.2 | *Myh2* | Cell organisation |
| C | -1.2 | -1.2 | -0.2 | -0.1 | *Msn* | Cell organisation |
| C | -1.3 | -1.1 | -0.5 | -0.3 | *Actb* | Cell organisation |
| C | -1.2 | -1.2 | -0.5 | 0.0 | *Ccl20* | Immune |
| C | -1.2 | -1.3 | 0.3 | 0.2 | *Cd63* | Cell organisation |
| C | -1.3 | -1.1 | 0.2 | -0.5 | *Ptpn6* | Signaling |
| C | -1.0 | -1.5 | -0.1 | 0.0 | *Hdac9* | Transcription |
| C | -1.5 | -1.0 | -0.1 | -0.7 | *A2m* | Immune |
| C | -1.3 | -1.2 | -0.1 | 0.2 | *Tfeb* | Transcription |
| C | -1.2 | -1.3 | -0.6 | -0.6 | *Slc25a24* | Stress: cytoprotection |
| C | -1.4 | -1.1 | 0.0 | 0.3 | *Hip1r* | Cell organisation |
| C | -1.0 | -1.5 | -0.4 | 0.3 | *Shroom3* | Cell organisation |
| C | -1.2 | -1.3 | -0.4 | -0.5 | *Krt8* | Stress: cytoprotection |
| C | -1.1 | -1.5 | -0.3 | -0.1 | *LOC110949300* | Uncharacterised |
| C | -1.1 | -1.5 | -0.2 | -0.2 | *Elovl1* | Metabolism |
| C | -1.1 | -1.5 | -0.8 | -0.9 | *Gdpd5* | Metabolism |
| C | -1.3 | -1.3 | -0.3 | -0.2 | *Tes* | Cell organisation |
| C | -1.0 | -1.6 | -0.4 | -0.3 | *Ppl* | Cell organisation |
| C | -1.4 | -1.2 | -0.6 | -0.1 | *Ccr9* | Immune |
| C | -1.2 | -1.5 | -0.5 | -0.2 | *Fhl1* | Growth |
| C | -1.4 | -1.3 | -0.5 | -0.5 | *Sh3yl1* | Cell organisation |
| C | -1.3 | -1.4 | -0.4 | 0.1 | *Cldn7* | Cell organisation |
| C | -1.2 | -1.5 | -0.7 | -0.5 | *Rab39b* | Cell organisation |
| C | -1.2 | -1.5 | -0.4 | -0.4 | *Pih1d1* | Transcription |
| C | -1.0 | -1.7 | -0.5 | -0.6 | *Amotl2* | Cell organisation |
| C | -1.1 | -1.7 | -1.1 | -0.4 | *Bicd1* | Cell organisation |
| C | -1.2 | -1.6 | 0.4 | 0.4 | *Mettl24* | Transcription |
| C | -1.3 | -1.5 | -0.9 | -0.8 | *Mmp28* | Stress: wound repair |
| C | -1.2 | -1.6 | 0.0 | -0.7 | *Ppp2r2b* | Signaling |
| C | -1.2 | -1.6 | 0.4 | 0.6 | *Enpp1* | Metabolism |
| C | -1.2 | -1.6 | -0.3 | 0.3 | *Iqgap1* | Cell organisation |
| C | -1.4 | -1.4 | -0.6 | -0.4 | *Pdk3* | Metabolism |
| C | -1.3 | -1.5 | -0.3 | 0.2 | *LOC110949034* | Uncharacterised |
| C | -1.3 | -1.5 | -0.1 | -0.7 | *Ctgf* | Cell organisation |
| C | -1.2 | -1.7 | -0.5 | 0.0 | *Frmd1* | Cell organisation |
| C | -1.3 | -1.6 | -0.2 | 0.1 | *Btk* | Immune |
| C | -1.4 | -1.5 | -1.0 | -1.3 | *Vgll3* | Transcription |
| C | -1.5 | -1.3 | -0.6 | -0.1 | *Degs2* | Metabolism |
| C | -1.7 | -1.2 | 0.3 | 0.4 | *Mapk8ip3* | Stress: JNK |
| C | -1.2 | -1.7 | 0.2 | 0.4 | *Tnfrsf12a* | Growth |
| C | -1.8 | -1.2 | -0.1 | -0.1 | *Plat* | Growth |
| C | -1.4 | -1.7 | -0.7 | -0.6 | *Gnaq* | Immune |
| C | -1.3 | -1.7 | -0.3 | 0.1 | *Slc16a5* | Transport |
| C | -1.7 | -1.4 | -0.1 | -0.1 | *Cstb* | Metabolism |
| C | -1.7 | -1.4 | 0.3 | 0.7 | *Cmklr1* | Signaling |
| C | -1.6 | -1.5 | -0.8 | -0.5 | *Grik1* | Transport |
| C | -1.3 | -1.8 | -0.7 | -0.1 | *Gjb2* | Transport |
| C | -1.6 | -1.6 | -0.5 | -0.3 | *Paqr8* | Growth |
| C | -1.6 | -1.5 | -0.3 | -0.3 | *Pcolce2* | Cell organisation |
| C | -1.4 | -1.8 | -0.6 | -0.5 | *Pkp1* | Cell organisation |
| C | -1.5 | -1.7 | 0.0 | 0.6 | *Plcg2* | Signaling |
| C | -1.8 | -1.4 | 0.1 | -0.1 | *Capn2* | Cell organisation |
| C | -1.6 | -1.6 | -1.0 | -0.3 | *Hhipl1* | Metabolism |
| C | -1.6 | -1.7 | 0.2 | 0.6 | *Capn6* | Cell organisation |
| C | -1.2 | -2.0 | -0.2 | 0.1 | *Pigk* | Cell organisation |
| C | -1.5 | -1.7 | -0.3 | -0.2 | *Epcam* | Cell organisation |
| C | -1.6 | -1.7 | -0.3 | -0.5 | *Lasp1* | Cell organisation |
| C | -1.8 | -1.5 | 0.1 | -0.3 | *Pip5kl1* | Metabolism |
| C | -1.6 | -1.7 | -0.3 | 0.1 | *Capns1* | Cell organisation |
| C | -1.8 | -1.5 | 0.1 | 0.3 | *Plxdc1* | Growth |
| C | -1.8 | -1.5 | -0.3 | 0.5 | *Myo1f* | Cell organisation |
| C | -1.8 | -1.5 | -0.5 | -0.6 | *Krt8* | Stress: cytoprotection |
| C | -2.0 | -1.3 | 0.2 | 0.7 | *Lgals1* | Stress: apoptosis |
| C | -1.9 | -1.4 | -0.4 | -0.1 | *Spock3* | Growth |
| C | -1.4 | -1.9 | 0.5 | -0.2 | *Cib2* | Cell organisation |
| C | -1.5 | -1.9 | -0.3 | -0.4 | *Fam118b* | Transcription |
| C | -1.6 | -1.7 | 0.1 | -0.2 | *Tmsb4x* | Cell organisation |
| C | -1.7 | -1.7 | -0.8 | 0.1 | *Slc6a18* | Transport |
| C | -1.5 | -1.8 | -0.8 | -0.7 | *Ptprj* | Immune |
| C | -1.7 | -1.7 | 0.6 | 0.2 | *Selm* | Metabolism |
| C | -1.8 | -1.6 | -0.1 | -0.1 | *Mboat1* | Metabolism |
| C | -1.5 | -1.9 | -0.5 | -0.2 | *Kinx* | Metabolism |
| C | -1.8 | -1.6 | -0.4 | -0.5 | *Racgap1* | Cell cycle |
| C | -1.7 | -1.7 | -0.1 | 0.5 | *Cx32.2* | Cell organisation |
| C | -1.9 | -1.4 | 0.4 | 0.1 | *Mxra7* | Growth |
| C | -1.7 | -1.7 | -0.3 | -0.2 | *Col6a3* | Cell organisation |
| C | -1.9 | -1.5 | -0.2 | -0.3 | *Ccl25* | Immune |
| C | -1.4 | -2.0 | -0.3 | -0.1 | *St14* | Growth |
| C | -1.6 | -1.9 | 0.0 | -0.4 | *Tpm4* | Cell organisation |
| C | -1.9 | -1.6 | -0.1 | -0.1 | *LOC110965801* | Uncharacterised |
| C | -1.6 | -1.9 | -0.5 | -0.6 | *Crip1* | Transport |
| C | -1.9 | -1.6 | 0.0 | -0.6 | *Sparc* | Growth |
| C | -1.9 | -1.7 | -0.7 | -0.2 | *Gapdh* | Metabolism |
| C | -2.0 | -1.6 | -1.0 | -0.6 | *Ccl19* | Immune |
| C | -1.9 | -1.7 | -0.3 | 0.0 | *Cotl1* | Cell organisation |
| C | -1.8 | -1.8 | 0.0 | -0.5 | *Pak3* | Cell organisation |
| C | -1.8 | -1.9 | 0.0 | 0.3 | *Psca* | Growth |
| C | -2.2 | -1.5 | -0.2 | -0.1 | *Pde4b* | Immune |
| C | -1.8 | -1.9 | 0.1 | 0.0 | *Capn2* | Cell organisation |
| C | -1.6 | -2.2 | -0.2 | 0.0 | *Apcs* | Stress: apoptosis |
| C | -1.6 | -2.2 | 0.3 | 0.2 | *LOC110961124* | Uncharacterised |
| C | -1.9 | -1.9 | 0.1 | -0.4 | *LOC110945845* | Uncharacterised |
| C | -2.1 | -1.8 | 0.6 | -0.6 | *Ctse* | Immune |
| C | -2.0 | -1.9 | 1.1 | 0.4 | *Gpc1* | Growth |
| C | -2.0 | -1.9 | 0.2 | 0.5 | *Cd9* | Cell organisation |
| C | -1.7 | -2.2 | -0.1 | 0.1 | *Fabp6* | Metabolism |
| C | -2.0 | -1.9 | -0.1 | 0.2 | *LOC110948076* | Uncharacterised |
| C | -1.8 | -2.1 | 0.0 | 0.6 | *Cx32.2* | Cell organisation |
| C | -2.1 | -2.0 | 0.0 | 0.4 | *Vwa7* | Uncharacterised |
| C | -1.9 | -2.2 | -0.2 | 0.1 | *Ptpn7* | Signaling |
| C | -2.2 | -1.9 | -0.3 | -0.3 | *Blnk* | Immune |
| C | -2.1 | -2.1 | -0.2 | -0.2 | *Col5a2* | Cell organisation |
| C | -2.2 | -2.1 | -0.1 | -0.4 | *Hmmr* | Cell cycle |
| C | -2.4 | -2.0 | -0.3 | 0.0 | *Aldoa* | Metabolism |
| C | -2.3 | -2.1 | 0.0 | -0.2 | *LOC110945824* | Uncharacterised |
| C | -2.1 | -2.4 | -0.2 | -0.5 | *C21orf33* | Uncharacterised |
| C | -2.5 | -2.1 | -0.5 | 0.0 | *Ckap4* | Stress: cytotoxicity |
| C | -2.4 | -2.2 | 0.4 | 0.1 | *Rab25* | Cell organisation |
| C | -2.2 | -2.5 | -0.1 | -0.2 | *Tmem238* | Uncharacterised |
| C | -2.4 | -2.3 | -0.3 | -0.3 | *Rgs21* | Signaling |
| C | -2.4 | -2.4 | -0.6 | -0.8 | *Prss27* | Metabolism |
| C | -2.6 | -2.2 | -0.1 | 0.4 | *Nmur1* | Signaling |
| C | -2.8 | -2.0 | 0.2 | 0.3 | *Mag* | Cell organisation |
| C | -2.2 | -2.6 | -0.1 | 0.1 | *Tpx2* | Cell cycle |
| C | -2.4 | -2.5 | -0.6 | -0.3 | *Capg* | Cell organisation |
| C | -2.7 | -2.4 | -0.3 | -0.4 | *Col12a1* | Cell organisation |
| C | -2.6 | -2.5 | -0.3 | -0.5 | *Krt18* | Cell organisation |
| C | -3.1 | -2.1 | 0.0 | -0.1 | *Olfm4* | Cell organisation |
| C | -2.6 | -2.6 | -0.2 | -0.5 | *C21orf33* | Uncharacterised |
| C | -2.6 | -2.7 | -0.4 | -0.2 | *Ccdc80* | Cell organisation |
| C | -2.1 | -3.4 | -0.4 | -0.6 | *Trim16* | Growth |
| C | -2.6 | -2.9 | -0.2 | -0.5 | *C21orf33* | Uncharacterised |
| C | -2.9 | -2.7 | -0.1 | 0.4 | *Cenpe* | Cell cycle |
| C | -2.8 | -2.9 | -0.6 | -0.9 | *Pls3* | Cell organisation |
| C | -2.8 | -3.1 | -0.2 | -0.6 | *Krt18* | Cell organisation |
| C | -2.9 | -3.5 | -0.2 | -0.4 | *Tmem229b* | Transcription |
| E | -0.4 | -0.3 | 1.0 | 2.5 | *Slc26a5* | Transport |
| E | -1.1 | 0.0 | 0.9 | 1.8 | *Cyp27a1* | Metabolism |
| E | 0.2 | -0.1 | 0.7 | 1.7 | *Zbtb12* | Transcription |
| E | 0.5 | 0.3 | 0.8 | 1.7 | *Slc3a2* | Transport |
| E | 0.6 | 0.7 | 0.8 | 1.6 | *Pprc1* | Growth |
| E | -0.6 | -0.4 | 0.4 | 1.5 | *Ripk2* | Immune |
| E | 0.9 | 0.3 | 0.7 | 1.5 | *Hsp90aa1* | Stress: HSP |
| E | -0.8 | -0.1 | 0.9 | 1.5 | *Dkk2* | Growth |
| E | 0.2 | -0.7 | 0.7 | 1.4 | *Slc7a11* | Transport |
| E | 0.6 | 0.0 | 0.4 | 1.4 | *Mknk1* | Stress: environmental stress |
| E | 0.9 | 0.9 | 0.6 | 1.4 | *Txnip* | Stress: ROS |
| E | 0.8 | -0.1 | 0.1 | 1.4 | *Irs2* | Signaling |
| E | 0.7 | 0.7 | 0.7 | 1.3 | *Itpkc* | Metabolism |
| E | 0.0 | 0.4 | 0.4 | 1.3 | *Rnf19b* | Stress: ubiquitination |
| E | 0.9 | 0.9 | 0.3 | 1.3 | *Bcl2l1* | Stress: anti-apoptosis |
| E | 0.5 | -0.6 | 0.2 | 1.3 | *Rasgef1b* | Signaling |
| E | -1.7 | 0.0 | 0.3 | 1.3 | *LOC110972545* | Uncharacterised |
| E | -0.4 | -0.5 | 1.7 | 1.2 | *Rpgrip1l* | Signaling |
| E | 0.3 | 0.8 | 0.8 | 1.2 | *Pawr* | Stress: apoptosis |
| E | 0.8 | 0.0 | -0.1 | 1.2 | *Ell* | Transcription |
| E | -0.9 | -1.3 | 0.5 | 1.2 | *Ctsk* | Cell organisation |
| E | 0.6 | 0.6 | 0.4 | 1.2 | *Tmem184b* | Signaling |
| E | 0.0 | 0.2 | 0.3 | 1.2 | *Pld3* | Metabolism |
| E | 0.8 | -0.2 | 0.0 | 1.2 | *Zbtb16* | Transcription |
| E | 0.5 | 0.3 | 0.1 | 1.1 | *LOC110970526* | Uncharacterised |
| E | 0.6 | 1.3 | 0.8 | 1.1 | *Ppm1h* | Cell cycle |
| E | 0.0 | 0.1 | -0.2 | 1.1 | *Rps27* | Transcription |
| E | 0.3 | 0.4 | 0.5 | 1.1 | *LOC110971639* | Uncharacterised |
| E | 0.8 | 0.0 | 0.0 | 1.1 | *Stk35* | Cell organisation |
| E | 0.4 | 0.4 | 0.8 | 1.1 | *Aldh9a1b* | Metabolism |
| E | 0.0 | -0.8 | 0.7 | 1.1 | *LOC110959004* | Uncharacterised |
| E | 0.6 | 0.7 | 0.4 | 1.1 | *Btg3* | Cell cycle |
| E | -0.1 | 0.0 | 0.9 | 1.0 | *Zbtb48* | Transcription |
| E | 0.6 | 1.0 | 0.7 | 1.0 | *Smarcd3* | Transcription |
| E | 0.5 | 0.4 | 0.5 | 1.0 | *Hprt1* | Metabolism |
| E | 0.3 | -0.9 | 0.8 | 1.0 | *Nr3c2* | Transcription |
| E | -0.3 | -0.9 | 0.3 | 1.0 | *Csnk1d* | Cell cycle |
| E | -1.1 | -0.5 | 0.2 | -1.0 | *Dclre1b* | Transcription |
| E | 0.7 | 0.3 | -0.9 | -1.1 | *Aprt* | Metabolism |
| E | -0.2 | 0.4 | -0.5 | -1.1 | *Chac1* | Stress: chaperone |
| E | -0.1 | -0.5 | -1.2 | -1.1 | *Creg2* | Metabolism |
| E | -0.3 | 0.2 | -0.4 | -1.2 | *Slc16a13* | Transport |
| E | -0.6 | -0.5 | -0.4 | -1.2 | *C2orf72* | Uncharacterised |
| E | -0.6 | -0.4 | -0.4 | -1.2 | *Fastkd1* | Metabolism |
| E | -0.4 | -0.1 | -0.9 | -1.2 | *Asb5* | Stress: ubiquitination |
| E | 0.0 | 0.5 | -0.3 | -1.3 | *Sfrp2* | Growth |
| E | -1.2 | -1.4 | -1.2 | -1.3 | *Prtg* | Growth |
| E | -0.5 | -0.6 | -1.1 | -1.4 | *Hlf* | Transcription |
| E | -0.9 | -0.8 | -0.9 | -1.7 | *Znf395* | Transcription |
| E | -0.3 | -0.6 | -0.3 | -1.8 | *Crygs* | Growth |
| D | 0.1 | 0.2 | 1.3 | 0.9 | *Filip1l* | Stress: apoptosis |
| D | -0.4 | -0.5 | 1.2 | 0.3 | *Esm1* | Growth |
| D | -0.6 | -0.6 | 1.2 | 0.0 | *Ac85c* | Cell organisation |
| D | -0.1 | 0.3 | 1.1 | 0.7 | *Nupr1* | Stress: cytoprotection |
| D | -0.7 | -0.1 | -1.1 | -0.8 | *Col1a1* | Cell organisation |
| D | 0.3 | -0.5 | -1.1 | -0.5 | *Pdcd10* | Stress: apoptosis |
| D | 0.6 | 0.9 | -1.2 | -0.1 | *Lpin2* | Metabolism |
| D | 0.4 | 0.2 | -1.3 | -0.8 | *Hyal1* | Metabolism |
| D | -0.4 | -0.5 | -1.4 | -0.6 | *Limd2* | Cell organisation |
| D | -0.9 | -1.0 | -1.5 | -0.6 | *Hspb6* | Stress: HSP |
| D | -1.0 | -0.9 | -1.5 | -1.0 | *Slc5a7* | Transport |
| D | -0.2 | -1.0 | -2.1 | -1.1 | *Klk8* | Growth |
| B | 0.6 | 1.9 | 0.2 | 0.4 | *Klhl24* | Stress: ubiquitination |
| B | 0.5 | 1.6 | 0.6 | 0.6 | *Slc6a19* | Transport |
| B | 1.2 | 1.6 | -0.8 | -0.4 | *Lpin1* | Metabolism |
| B | 0.7 | 1.5 | -0.5 | 0.1 | *Mlf1* | Stress: cell cycle arrest |
| B | 1.0 | 1.4 | 0.7 | 0.5 | *Gfra4* | Signaling |
| B | 0.0 | 1.3 | 0.1 | 0.5 | *Nav2* | Growth |
| B | 0.4 | 1.3 | -0.2 | -0.1 | *Lcat* | Metabolism |
| B | 0.1 | 1.3 | -1.1 | -0.8 | *Ugt1a1* | Metabolism |
| B | 0.1 | 1.2 | 0.3 | 0.1 | *Smagp* | Cell organisation |
| B | 0.8 | 1.1 | -0.4 | -0.5 | *Etnk2* | Metabolism |
| B | 0.2 | 1.1 | 0.5 | 0.4 | *Nacc1* | Transcription |
| B | 0.6 | 1.1 | -0.9 | -0.7 | *Slco1c1* | Transport |
| B | 0.7 | 1.0 | 0.0 | 0.3 | *Btn3a2* | Immune |
| B | -0.6 | -1.0 | -0.2 | -0.3 | *Slx4* | Cell cycle |
| B | -0.2 | -1.0 | 0.1 | -0.1 | *Tnfsf10* | Stress: apoptosis |
| B | -0.7 | -1.0 | 0.2 | -0.1 | *Cdc42* | Signaling |
| B | -0.2 | -1.0 | 0.0 | -0.2 | *P2ry14* | Immune |
| B | -0.5 | -1.1 | -0.2 | -0.2 | *Slc41a1* | Transport |
| B | -1.0 | -1.1 | -0.5 | -0.6 | *Klf6* | Transcription |
| B | -0.8 | -1.1 | -0.4 | 0.2 | *Thbs2* | Cell organisation |
| B | -0.7 | -1.1 | 0.2 | 0.1 | *Bbs4* | Cell organisation |
| B | 0.2 | -1.1 | 0.0 | 0.7 | *C6* | Immune |
| B | -0.6 | -1.1 | -0.9 | -0.9 | *Nat10* | Transcription |
| B | -0.9 | -1.2 | -0.4 | -0.2 | *Cfl1* | Cell organisation |
| B | -0.4 | -1.2 | -0.1 | -0.3 | *Ccng2* | Cell cycle |
| B | -0.6 | -1.2 | -0.5 | -0.3 | *Tat* | Metabolism |
| B | -0.8 | -1.2 | 0.2 | 0.3 | *Pde5a* | Signaling |
| B | -0.4 | -1.2 | -0.9 | -0.7 | *Fblim1* | Cell organisation |
| B | -0.7 | -1.2 | -0.5 | -0.3 | *Sult1c2* | Metabolism |
| B | -0.6 | -1.3 | -0.2 | -0.4 | *Ctbp2* | Transcription |
| B | -1.2 | -1.3 | 0.3 | 0.6 | *Acly* | Metabolism |
| B | 0.0 | -1.3 | -0.7 | -0.1 | *Axin2* | Signaling |
| B | -1.0 | -1.4 | 0.4 | 0.3 | *Card9* | Immune |
| B | -1.1 | -1.4 | -0.3 | 0.3 | *Isyna1* | Metabolism |
| B | -0.5 | -1.4 | 0.0 | -0.3 | *Chst3* | Metabolism |
| B | -0.4 | -1.4 | -0.1 | -0.3 | *Kiz* | Cell cycle |
| B | 0.7 | -1.4 | -0.8 | -0.7 | *F2rl1* | Immune |
| B | -1.1 | -1.5 | -1.0 | 0.0 | *Anpep* | Metabolism |
| B | -0.8 | -1.5 | 0.1 | 0.8 | *Mvp* | Signaling |
| B | -1.0 | -1.5 | -0.9 | 0.2 | *Loxl2* | Cell organisation |
| B | 0.0 | -1.5 | -0.2 | 0.2 | *Gadd45g* | Stress: environmental stress |
| B | -0.9 | -1.5 | 0.1 | -0.5 | *Dhrs11* | Metabolism |
| B | -1.2 | -1.5 | -0.1 | -0.4 | *Tpm1* | Cell organisation |
| B | -0.8 | -1.5 | -0.4 | -0.3 | *Cttnbp2nl* | Cell organisation |
| B | -1.3 | -1.6 | 0.2 | 0.2 | *Ncapd2* | Cell cycle |
| B | -0.6 | -1.6 | -0.6 | 0.0 | *Bub1* | Cell cycle |
| B | -0.7 | -1.6 | -0.6 | -0.1 | *Fbln1* | Cell organisation |
| B | -0.5 | -1.6 | -0.5 | -0.2 | *Homer2* | Signaling |
| B | -1.1 | -1.6 | -0.8 | -0.8 | *Tnfrsf21* | Stress: apoptosis |
| B | -1.0 | -1.6 | 0.1 | -0.3 | *P2rx7* | Immune |
| B | -0.5 | -1.7 | -0.5 | -0.1 | *Klf13* | Transcription |
| B | -1.1 | -1.7 | -0.2 | -1.2 | *Actc1* | Cell organisation |
| B | -0.8 | -1.7 | -1.1 | -0.1 | *Cnn1* | Cell organisation |
| B | -0.5 | -1.7 | -0.6 | 0.0 | *Holotricin-3* | Immune |
| B | 1.4 | -1.8 | -0.5 | -0.4 | *Casp3* | Stress: apoptosis |
| B | -0.7 | -1.8 | -0.8 | -0.9 | *Lin7a* | Cell organisation |
| B | 0.2 | -1.9 | -0.2 | -0.2 | *Pdk2* | Stress: apoptosis |
| B | -1.3 | -2.0 | 1.1 | -0.3 | *Haus5* | Cell cycle |
| B | -1.0 | -2.0 | 0.0 | -0.3 | *Il12rb2* | Immune |
| B | -0.4 | -2.0 | -0.3 | -0.4 | *Alas1* | Metabolism |
| B | 0.1 | -2.0 | -0.1 | 0.3 | *S100p* | Signaling |
| B | 1.1 | -2.2 | -0.4 | -0.5 | *Lad1* | Cell organisation |
| B | -1.3 | -2.4 | -0.4 | -0.4 | *Dstn* | Cell organisation |
| B | -1.5 | -2.6 | -0.7 | -1.1 | *Map6* | Cell organisation |
| B | -0.9 | -2.8 | -0.3 | 0.4 | *Pak1* | Stress: signalling |
| B | -1.2 | -2.9 | -0.1 | 0.1 | *Elovl6* | Metabolism |
| A | 2.7 | 1.1 | 0.0 | 0.6 | *Bbox1* | Metabolism |
| A | 2.6 | 0.6 | -0.3 | 0.2 | *Cdhr2* | Cell organisation |
| A | 2.5 | 1.3 | 0.2 | 0.5 | *Midn* | Growth |
| A | 2.3 | -1.0 | -0.5 | -0.8 | *LOC110951615* | Uncharacterised |
| A | 2.2 | 0.4 | 0.0 | -0.3 | *Rbp2* | Metabolism |
| A | 2.2 | 1.6 | 0.3 | 0.4 | *Mthfd2* | Metabolism |
| A | 2.2 | 1.3 | 0.6 | 0.7 | *Prodh* | Stress: apoptosis |
| A | 2.2 | -0.2 | -0.3 | 0.3 | *Parm1* | Stress: apoptosis |
| A | 2.2 | 1.2 | 1.0 | 1.0 | *Rnf122* | Stress: apoptosis |
| A | 2.2 | 0.9 | 0.3 | 0.9 | *Nr4a3* | Transcription |
| A | 2.1 | 0.7 | 0.1 | 1.2 | *Alas1* | Metabolism |
| A | 2.1 | 0.9 | 0.9 | 1.1 | *Fosl1* | Growth |
| A | 2.1 | 1.2 | 1.0 | 0.8 | *Crem* | Transcription |
| A | 2.0 | 0.7 | 0.1 | 0.6 | *Midn* | Growth |
| A | 2.0 | 0.4 | 0.5 | 0.5 | *Ndel1* | Cell organisation |
| A | 2.0 | -0.2 | -0.4 | 0.0 | *Dab1* | Growth |
| A | 2.0 | 0.8 | 0.0 | 0.5 | *Csnk1e* | Circadian rhythm |
| A | 1.9 | 1.2 | 0.5 | 0.8 | *Slc7a3* | Transport |
| A | 1.9 | 0.3 | -0.4 | -0.1 | *Ciart* | Circadian rhythm |
| A | 1.9 | 1.1 | 0.7 | 0.5 | *Oxct1* | Metabolism |
| A | 1.9 | -1.1 | -0.5 | -0.1 | *Slc16a9* | Transport |
| A | 1.9 | 1.2 | 0.7 | 0.9 | *Eif4g2* | Transcription |
| A | 1.8 | 0.7 | -0.2 | 0.2 | *Usp2* | Circadian rhythm |
| A | 1.8 | 0.7 | 0.5 | 0.8 | *Zmynd19* | Signaling |
| A | 1.8 | 1.0 | 0.5 | 0.5 | *Hemk1* | Transcription |
| A | 1.7 | 1.3 | 0.3 | 0.6 | *Pptc7* | Metabolism |
| A | 1.7 | 0.4 | 0.1 | 0.6 | *Comt* | Stress: catecholamine |
| A | 1.7 | 1.2 | 0.4 | 0.7 | *Hspa13* | Stress: HSP |
| A | 1.7 | 1.0 | 0.6 | 1.2 | *Nfe2l1* | Stress: oxidative stress (GoBP) |
| A | 1.7 | 0.8 | -0.1 | 0.4 | *Cyr61* | Growth |
| A | 1.7 | 0.0 | 0.1 | 0.3 | *Rorb* | Circadian rhythm |
| A | 1.7 | 0.8 | 0.7 | 0.6 | *Serpine1* | Metabolism |
| A | 1.7 | 0.9 | -0.3 | 0.5 | *Dio3* | Metabolism |
| A | 1.6 | 1.3 | 0.7 | 0.7 | *Acbd5* | Metabolism |
| A | 1.6 | 0.9 | 0.0 | 0.4 | *Rfk* | Stress: ROS |
| A | 1.6 | 0.7 | 0.0 | -0.9 | *Slc22a13* | Transport |
| A | 1.5 | -0.4 | -0.2 | -0.4 | *Adss* | Metabolism |
| A | 1.5 | 0.7 | 0.3 | 0.4 | *Nceh1* | Metabolism |
| A | 1.5 | -0.3 | -1.0 | -0.1 | *Tmem45a* | Uncharacterised |
| A | 1.5 | 1.0 | 0.5 | 0.9 | *Xkr8* | Stress: apoptosis |
| A | 1.5 | 1.1 | -0.3 | 0.6 | *Klf11* | Stress: apoptosis |
| A | 1.5 | 0.8 | 0.9 | 0.9 | *Crot* | Metabolism |
| A | 1.5 | 0.9 | -0.3 | 0.1 | *Grb10* | Growth |
| A | 1.5 | 1.2 | 0.4 | 0.5 | *G6pc* | Metabolism |
| A | 1.5 | -0.3 | -0.4 | 0.2 | *Snrk* | Growth |
| A | 1.5 | 0.3 | -0.9 | -0.2 | *Atnb233* | Transport |
| A | 1.5 | 0.3 | 0.3 | -0.2 | *Bcl6* | Transcription |
| A | 1.5 | 0.1 | 0.2 | 0.7 | *Irs2* | Signaling |
| A | 1.5 | -0.1 | 0.4 | 0.5 | *Gadd45a* | Stress: environmental stress |
| A | 1.4 | 0.3 | -0.1 | -0.2 | *Fabp2* | Metabolism |
| A | 1.4 | 1.2 | 0.0 | 1.1 | *Klhl17* | Stress: ubiquitination |
| A | 1.4 | 0.9 | 0.2 | 0.3 | *Gpr108* | Uncharacterised |
| A | 1.4 | 0.4 | 0.1 | 0.2 | *Klf3* | Transcription |
| A | 1.4 | 0.9 | 0.8 | 0.9 | *C19orf24* | Uncharacterised |
| A | 1.4 | 0.6 | 0.2 | 0.5 | *Eepd1* | Cell cycle |
| A | 1.4 | 0.7 | 0.5 | 0.6 | *Slc25a20* | Transport |
| A | 1.3 | 0.9 | 0.4 | 1.0 | *Agt* | Stress: angiotensin, blood pressure |
| A | 1.3 | 0.8 | -0.4 | 0.8 | *Tlr5* | Immune |
| A | 1.3 | 0.9 | 0.4 | 0.3 | *St7* | Uncharacterised |
| A | 1.3 | 1.0 | -0.1 | 0.0 | *Chac2* | Stress: apoptosis |
| A | 1.3 | 0.3 | 0.2 | 0.6 | *Dusp8* | Signaling |
| A | 1.3 | 0.5 | -0.1 | 0.0 | *Cycs* | Metabolism |
| A | 1.3 | 0.7 | 0.4 | 0.6 | *Fbxo31* | Cell cycle |
| A | 1.3 | 0.5 | 0.0 | 0.2 | *Klf15* | Transcription |
| A | 1.2 | 0.8 | 0.1 | 0.7 | *Acox1* | Metabolism |
| A | 1.2 | 0.8 | 0.6 | 0.2 | *Myom1* | Cell organisation |
| A | 1.2 | 0.4 | 0.3 | 0.3 | *Acads* | Metabolism |
| A | 1.2 | 0.9 | -0.1 | -0.1 | *Kcnk5* | Transport |
| A | 1.2 | 0.8 | 0.5 | 0.8 | *Cog2* | Cell organisation |
| A | 1.2 | 0.7 | 0.6 | 0.8 | *Srcin1* | Growth |
| A | 1.1 | 0.6 | 0.1 | 0.2 | *Dhx35* | Transcription |
| A | 1.1 | 0.7 | 0.5 | 0.8 | *Nbr1* | Stress: ubiquitination |
| A | 1.1 | 0.6 | 0.3 | 0.4 | *Acadvl* | Metabolism |
| A | 1.1 | -0.3 | 0.2 | 0.6 | *Rad54l2* | Transcription |
| A | 1.1 | 0.3 | 0.0 | 0.5 | *Rbck1* | Stress: ubiquitination |
| A | 1.1 | 1.0 | 0.2 | -0.1 | *Rundc3b* | Uncharacterised |
| A | 1.1 | 0.2 | 0.0 | 0.7 | *Megf9* | Uncharacterised |
| A | 1.1 | 0.6 | -0.1 | -0.2 | *Ugdh* | Metabolism |
| A | 1.1 | 0.2 | 0.7 | 0.6 | *Ing1* | Stress: apoptosis |
| A | 1.1 | 0.8 | 0.2 | 0.4 | *Lmo4* | Transcription |
| A | 1.0 | 0.7 | 0.0 | 0.2 | *Crat* | Metabolism |
| A | 1.0 | 0.4 | 0.5 | 0.5 | *Mfn2* | Metabolism |
| A | 1.0 | 0.6 | 0.5 | 0.6 | *Acad11* | Metabolism |
| A | 1.0 | -0.3 | -0.1 | 0.4 | *Cystm1* | Immune |
| A | 1.0 | 0.7 | 0.1 | 0.4 | *Ddx6* | Transcription |
| A | 1.0 | 0.3 | 0.3 | -0.7 | *Dll4* | Signaling |
| A | 1.0 | 0.7 | 0.3 | 0.4 | *Aebp2* | Transcription |
| A | 1.0 | 0.8 | 0.3 | 0.1 | *Setd3* | Transcription |
| A | 1.0 | 1.0 | 0.3 | 0.2 | *Tram2* | Metabolism |
| A | 1.0 | 0.2 | 0.2 | 0.4 | *Pip4k2c* | Metabolism |
| A | 1.0 | 0.6 | 0.8 | 0.6 | *Ap3s1* | Cell organisation |
| A | -1.0 | -0.8 | 0.2 | 0.2 | *Npb* | Stress: regulates |
| A | -1.0 | 0.1 | -0.5 | -0.6 | *Atmin* | Stress: cytoprotection |
| A | -1.0 | -0.9 | -0.7 | -0.2 | *LOC110958474* | Uncharacterised |
| A | -1.1 | -1.0 | -0.4 | -0.4 | *S100a16* | Signaling |
| A | -1.1 | -0.8 | 0.5 | -0.9 | *Erich3* | Uncharacterised |
| A | -1.1 | -0.9 | -0.1 | 0.5 | *Lhfpl2* | Signaling |
| A | -1.1 | -0.7 | 0.1 | -0.5 | *Epsti1* | Transcription |
| A | -1.2 | 0.2 | 0.9 | 0.3 | *Kcnk10* | Transport |
| A | -1.2 | 0.4 | -0.4 | -0.1 | *Kalrn* | Cell organisation |
| A | -1.2 | -0.9 | 0.1 | -0.2 | *Tulp3* | Transcription |
| A | -1.2 | -0.5 | -0.1 | -0.2 | *Gpr4* | Signaling |
| A | -1.2 | -0.5 | -0.2 | -0.7 | *Ifi44* | Cell organisation |
| A | -1.2 | 0.1 | -0.4 | -0.8 | *Ifi27l2b* | Stress: apoptosis |
| A | -1.3 | -1.2 | -0.3 | -0.4 | *Depdc4* | Signaling |
| A | -1.3 | -1.1 | -0.4 | 0.3 | *Tlr1* | Immune |
| A | -1.3 | -0.9 | -0.2 | -0.3 | *Tcerg1* | Transcription |
| A | -1.4 | -1.1 | -0.1 | 0.8 | *Slc43a2* | Transport |
| A | -1.4 | 0.1 | -0.1 | -0.5 | *Armc2* | Uncharacterised |
| A | -1.4 | -1.1 | 0.0 | -0.1 | *Znf773* | Transcription |
| A | -1.4 | -0.6 | -0.4 | -0.3 | *Armc4* | Cell organisation |
| A | -1.4 | -0.4 | -0.5 | -0.3 | *Nefh* | Cell organisation |
| A | -1.4 | -0.7 | 0.2 | 0.2 | *Ccdc92* | Uncharacterised |
| A | -1.4 | -0.6 | 0.3 | -0.4 | *Rnf213* | Stress: ubiquitination |
| A | -1.4 | -1.1 | 0.3 | 0.2 | *LOC110961596* | Uncharacterised |
| A | -1.4 | -0.8 | -0.1 | -0.8 | *Sfr1* | Cell cycle |
| A | -1.4 | -0.8 | -0.3 | -0.6 | *None* | None |
| A | -1.5 | -0.4 | 0.4 | -0.6 | *Herc4* | Stress: ubiquitination |
| A | -1.5 | -1.4 | -0.3 | -0.2 | *LOC110972172* | Uncharacterised |
| A | -1.5 | -0.9 | 0.1 | 0.2 | *Pip5k1c* | Cell organisation |
| A | -1.5 | -0.2 | 0.6 | 0.7 | *Cd300lf* | Immune |
| A | -1.5 | -1.0 | 0.3 | -0.3 | *S100a1* | Signaling |
| A | -1.5 | -0.8 | 0.7 | 0.3 | *Slc28a3* | Transport |
| A | -1.5 | -0.8 | 0.4 | 0.0 | *Krt18* | Cell organisation |
| A | -1.6 | -1.0 | -0.8 | -0.9 | *Tm6sf1* | Metabolism |
| A | -1.6 | -0.6 | 0.0 | -0.9 | *Sned1* | Uncharacterised |
| A | -1.6 | -0.9 | 0.6 | 0.6 | *Fbn1* | Metabolism |
| A | -1.6 | -0.9 | -0.2 | -0.9 | *Cmpk2* | Metabolism |
| A | -1.7 | -0.6 | 0.0 | 0.1 | *Fam150b* | Growth |
| A | -1.7 | -0.8 | -0.3 | -0.1 | *Fcrl6* | Immune |
| A | -1.7 | -1.1 | 0.3 | 0.9 | *Crem* | Transcription |
| A | -1.8 | -1.0 | -0.1 | -0.5 | *H1f0b* | Transcription |
| A | -1.8 | -1.1 | 0.2 | 0.2 | *Mpeg1* | Immune |
| A | -1.8 | -0.7 | -0.5 | -0.9 | *Plxdc1* | Growth |
| A | -1.9 | 0.3 | 0.0 | -0.8 | *Gimap4* | Immune |
| A | -1.9 | -1.6 | 0.4 | 0.5 | *Ceacam1* | Cell organisation |
| A | -1.9 | -1.0 | 0.2 | 0.1 | *LOC110972118* | Uncharacterised |
| A | -1.9 | -1.5 | 0.0 | 0.1 | *Foxm1* | Cell cycle |
| A | -1.9 | -0.4 | -0.5 | 0.1 | *Sac3d1* | Cell cycle |
| A | -2.0 | -1.6 | 0.0 | 0.7 | *Mmp19* | Cell organisation |
| A | -2.1 | -1.4 | -1.0 | -0.7 | *Prr15* | Growth |
| A | -2.2 | -1.0 | 0.0 | 0.4 | *Rgcc* | Cell cycle |
| A | -2.2 | -1.4 | -0.2 | -0.4 | *Pcolce2* | Cell organisation |
| A | -2.2 | -0.4 | 0.6 | -0.5 | *Ktn1* | Cell organisation |
| A | -2.3 | -0.4 | 0.0 | -0.5 | *Aadacl4* | Metabolism |
| A | -2.5 | -1.6 | -0.1 | 0.6 | *Ghrhr* | Growth |
| A | -2.6 | -0.2 | -1.1 | -1.5 | *Fasn* | Metabolism |

**Table S4.** List of differentially expressed genes, log2 differential expression for each treatment relative to the respective population’s control, location in Venn diagram (Fig. 4), and the assigned main or most likely function according to database and literature searches.
